# Supplementary material
Source: PubMed Central journal article supplement (PMC3740858)
Supplement: 1219683110_pnas.201219683SI.pdf [file 1219683110_pnas.201219683SI.pdf]

# Supporting Information

Wang et al. 10.1073/pnas.1219683110

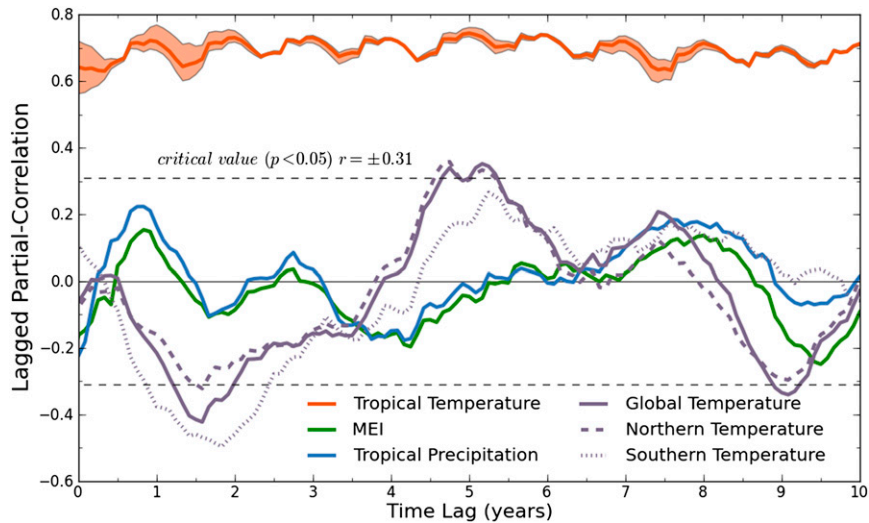

**Fig. S1.** Partial correlations between the atmospheric CO<sub>2</sub> growth rate, the concurrent tropical land-surface temperature, and other climate variables at various time lags. A partial correlation represents the correlation between two variables with the possible effects of a third (control) variable on them being excluded (1). Specifically, the partial correlations between the CO<sub>2</sub> growth rate and the concurrent tropical land temperature are calculated with one of the five other lagged climate variables alternately used as the control variable, resulting in a set of five partial-correlation values at every time lag (of the control variables). The mean and the range of the partial correlations between the CO<sub>2</sub> growth rate and the concurrent tropical temperature are indicated by the orange line and the orange shading, respectively. In comparison, the partial correlations between CO<sub>2</sub> growth rate and each of the five other lagged climate variables are calculated with the concurrent tropical land temperature as the control variable. Note that the tropical temperature is fixed at a time lag of 0 y (i.e., concurrent with the CO<sub>2</sub> growth rate), so that the horizontal axis (i.e., "abscissa") indicates only the time lags in the other five climate variables. The definitions of the spatial extents (e.g., "tropical," "northern," "southern," and "global") are the same as in Fig. 2. Also, the critical values for the correlations at 95% significance levels ( $P < 0.05$ ) are estimated by the same methods as described in Fig. 2.

1. Kendall MG, Stuart A (1979) *The Advanced Theory of Statistics: Inference and Relationship* (Charles Griffin, London), 4th Ed, Vol 2.







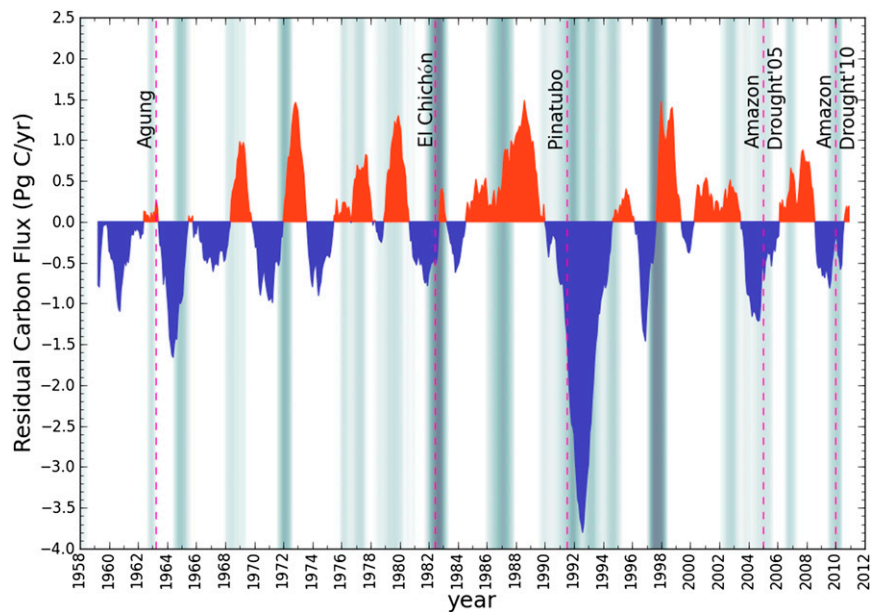

**Fig. S6.** Same as Fig. 4 but with the residual carbon flux anomalies estimated by the differences between the observed atmospheric CO<sub>2</sub> growth rates and those estimated from tropical land precipitation anomalies with a linear regression model that emphasizes the “normal” relationship between the two fields. That is, we first estimated the linear regression relationship between the CO<sub>2</sub> growth rate and tropical precipitation by masking out their anomalies during 1991 to 1994, which significantly deviated from their coupling during other periods (Fig. 1 and Fig. S2). We then applied the obtained linear relationship to the whole precipitation records (including 1991–1994) to estimate the expected CO<sub>2</sub> growth rates and compared the estimates with the observations. The residual carbon fluxes calculated in this fashion minimize the differences between the observed and the estimated CO<sub>2</sub> growth rate under normal conditions but highlight their inconsistency during 1991 to 1994. As shown, the negative residual anomalies (i.e., extra carbon sink) estimated for this period have a magnitude (absolute value, hereafter the same) over 3.5 PgC/yr, more than two times as large as any other residual anomalies in the 50-y data records. They are also significantly larger than the corresponding residual anomalies estimated from the coupling between atmospheric CO<sub>2</sub> growth rate and tropical land-surface temperatures (~1.7 PgC/yr; Fig. 4, which does not significantly change with or without the 1991–1994 anomalies masked out in the regression analysis). Such an intense extra carbon sink is very difficult to explain by previously proposed biogeophysical factors that occurred around 1991 to 1994 (as discussed in the text) and raises questions regarding whether the normal coupling between tropical precipitation and the CO<sub>2</sub> growth rate truly reflects the sensitivity of tropical NEE to interannual precipitation variations.

**Table S1. SDs of interannual variations of tropical carbon fluxes**

| Simulation | SD, PgC/y   |              |             |
|------------|-------------|--------------|-------------|
|            | NPP         | Rh           | NEE         |
| LPJ        | 0.97 (0.44) | 0.54 (0.43)  | 1.03 (0.56) |
| HyLand     | 0.52 (0.41) | 0.49 (0.61)  | 0.44 (0.48) |
| SHE        | 1.00 (0.37) | 0.30 (0.15*) | 0.96 (0.36) |
| TRIFFID    | 1.42 (0.33) | 0.42 (0.55)  | 1.54 (0.68) |
| Mean       | 0.92 (0.42) | 0.32 (0.55)  | 0.93 (0.65) |

Sources of simulations are as follows: HyLand (1), LPJ (2), SHE (3), and TRIFFID (4) from the model experiments described previously (5, 6). Mean indicates the ensemble mean of the models. The simulated tropical carbon fluxes include NPP, Rh, and NEE. Values in parentheses represent “optimal” variability of the corresponding variables estimated through regression analysis to minimize the deviations of the resulting NEE from the observed atmospheric CO<sub>2</sub> growth rate. Note that, in the regression analysis, we treat the ensemble mean as an individual model. LPJ, Lund–Potsdam–Jena Dynamic Global Vegetation Model; NEE, net ecosystem exchange; NPP, net primary production; Rh, heterotrophic respiration; SHE, Sheffield–Dynamic Global Vegetation Model; TRIFFID, Top-down Representation of Interactive Foliage and Flora Including Dynamics Dynamic Global Vegetation Model.

\*The scaling coefficient for this variable is statistically nonsignificant.

1. Friend AD, White A (2000) Evaluation and analysis of a dynamic terrestrial ecosystem model under preindustrial conditions at the global scale. *Global Biogeochem Cycles* 14:1173–1190.
2. Sitth S, et al. (2003) Evaluation of ecosystem dynamics, plant geography and terrestrial carbon cycling in the LPJ dynamic vegetation model. *Glob Change Biol* 9:161–185.
3. Woodward FI, Lomas MR (2004) Vegetation dynamics—simulating responses to climatic change. *Biol Rev Camb Philos Soc* 79(3):643–670.
4. Cox PM (2001) *Description of the “TRIFFID” Dynamic Global Vegetation Model*. Hadley Centre Technical Note 24 (United Kingdom Meteorological Office, Bracknell, UK).
5. Sitth S, et al. (2008) Evaluation of the terrestrial carbon cycle, future plant geography and climate-carbon cycle feedbacks using five Dynamic Global Vegetation Models (DGVMs). *Glob Change Biol* 14:2015–2039.
6. Le Quéré C, et al. (2009) Trends in the sources and sinks of carbon dioxide. *Nat Geosci* 2:831–836.

**Table S2. Correlations of simulated tropical NEE with tropical land-surface air temperature, land precipitation, and atmospheric CO<sub>2</sub> growth rate**

| Simulation | <i>r</i> of NEE |               |                 |
|------------|-----------------|---------------|-----------------|
|            | Temperature     | Precipitation | CO <sub>2</sub> |
| LPJ        | 0.80 (0.81)     | −0.55 (−0.31) | 0.55 (0.58)     |
| HyLand     | 0.75 (0.69)     | −0.76 (−0.63) | 0.45 (0.50)     |
| SHE        | 0.67 (0.68)     | −0.78 (−0.74) | 0.38 (0.38)     |
| TRIFFID    | 0.83 (0.90)     | −0.77 (−0.46) | 0.56 (0.71)     |
| Mean       | 0.82 (0.90)     | −0.76 (−0.39) | 0.53 (0.67)     |

Sources of simulations are as follows: HyLand (1), LPJ (2), SHE (3), and TRIFFID (4) from the model experiments described previously (5, 6). As in Table S1, values in parentheses represent “optimal” correlations estimated through regression analysis. LPJ, Lund–Potsdam–Jena Dynamic Global Vegetation Model; NEE, net ecosystem exchange; SHE, Sheffield–Dynamic Global Vegetation Model; TRIFFID, Top-down Representation of Interactive Foliage and Flora Including Dynamics Dynamic Global Vegetation Model.

1. Friend AD, White A (2000) Evaluation and analysis of a dynamic terrestrial ecosystem model under preindustrial conditions at the global scale. *Global Biogeochem Cycles* 14:1173–1190.
2. Sitch S, et al. (2003) Evaluation of ecosystem dynamics, plant geography and terrestrial carbon cycling in the LPJ dynamic vegetation model. *Glob Change Biol* 9:161–185.
3. Woodward FI, Lomas MR (2004) Vegetation dynamics—simulating responses to climatic change. *Biol Rev Camb Philos Soc* 79(3):643–670.
4. Cox PM (2001) *Description of the “TRIFFID” Dynamic Global Vegetation Model*. Hadley Centre Technical Note 24 (UK Meteorological Office, Bracknell, UK).
5. Sitch S, et al. (2008) Evaluation of the terrestrial carbon cycle, future plant geography and climate-carbon cycle feedbacks using five Dynamic Global Vegetation Models (DGVMs). *Glob Change Biol* 14:2015–2039.
6. Le Quéré C, et al. (2009) Trends in the sources and sinks of carbon dioxide. *Nat Geosci* 2:831–836.
